# Supplementary material for: Methylation profiling identifies two subclasses of squamous cell carcinoma related to distinct cells of origin
Source: PubMed Central journal article supplement (PMC5805678; doi:10.1038/s41467-018-03025-1), 2018-02-08
Supplement: 41467_2018_3025_MOESM1_ESM.pdf [file 41467_2018_3025_MOESM1_ESM.pdf]

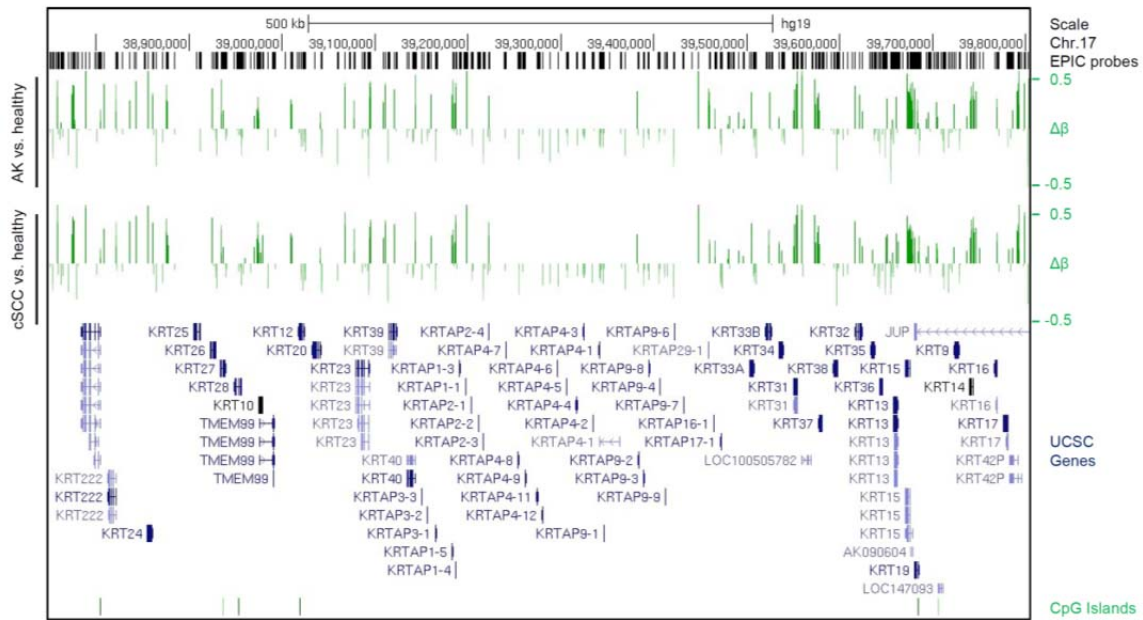

18

19 **Supplementary Figure 1** University of California Santa Cruz (UCSC) genome browser  
 20 tracks showing DNA methylation differences ( $P < 0.05$ , F-test, vertical green lines) at the  
 21 keratin gene cluster of chromosome 17 for Actinic keratosis (AK) (upper part) and  
 22 cutaneous squamous cell carcinoma (cSCC) (lower part) in comparison to healthy  
 23 epidermis.

24

25

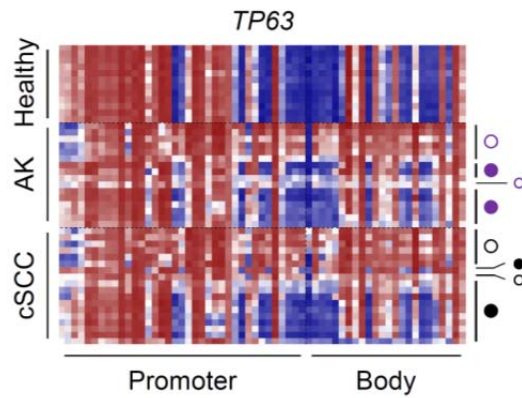

26

27 **Supplementary Figure 2** DNA methylation patterns of the *TP63* gene. The heatmap  
 28 shows the DNA methylation level (in  $\beta$  values, from blue (=0) to red (=1) of probes  
 29 (columns) located in the *TP63* promoter and gene body, in healthy, AK and cSCC samples  
 30 (rows). Filled and empty circles highlight the two distinct subclasses of AK (purple) and  
 31 cSCC (black) samples, respectively.

32

| IPA. Physiological System Development and Function | P-Value           | Genes |
|----------------------------------------------------|-------------------|-------|
| Tissue development                                 | 2.92E-04-1.26E-13 | 407   |
| Embryonic development                              | 2.75E-04-2.57E-12 | 292   |
| Organismal development                             | 2.75E-04-2.57E-12 | 397   |
| Cardiovascular system development and function     | 2.60E-04-8.19E-12 | 175   |
| Nervous system development and function            | 2.81E-04-1.65E-11 | 238   |

33

34 **Supplementary Figure 3** Ingenuity Pathway Analysis (IPA) performed with the 1188  
35 genes located within the subset of enhancer regions lost during keratinocyte  
36 differentiation<sup>1</sup> and found hypermethylated in the AK/cSCC subclass related to epidermal  
37 stem cells (EpSC). *P*-values were calculated using Fisher's exact test.

38

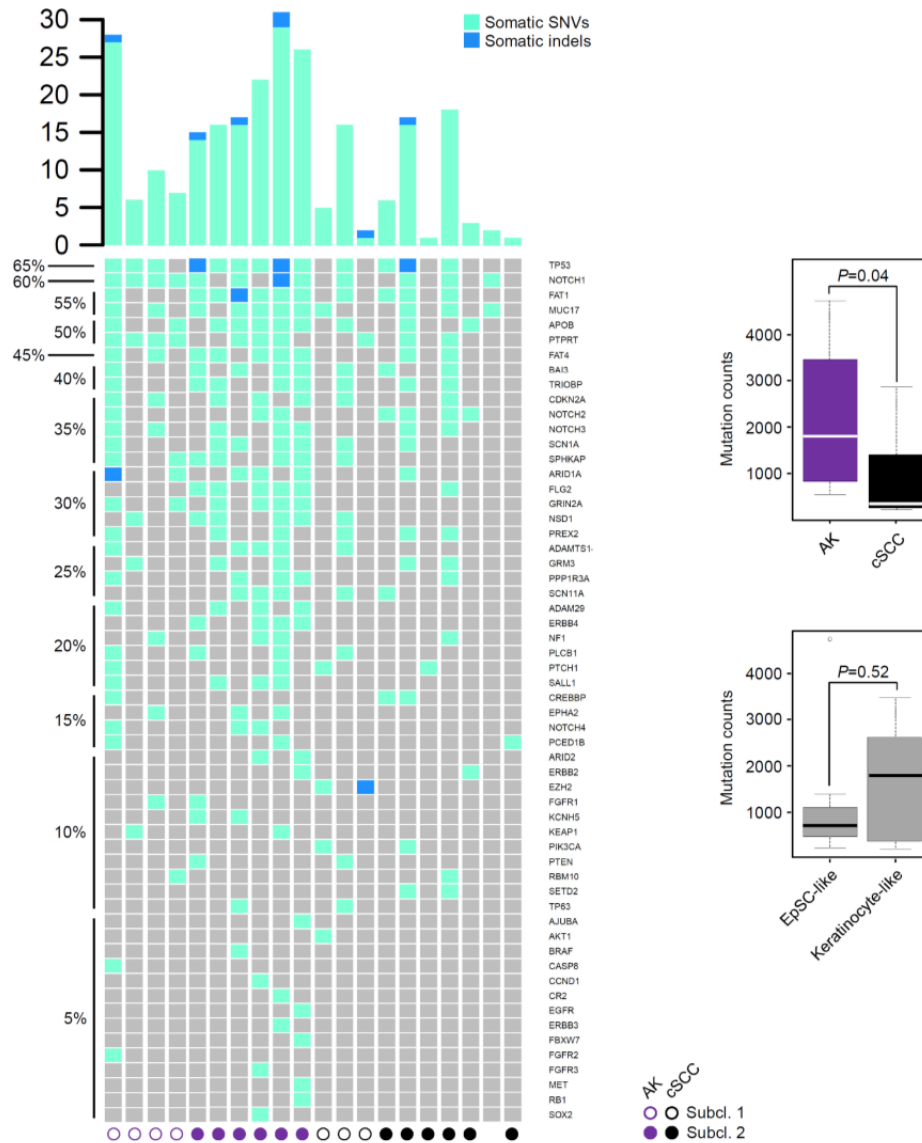

39

40 **Supplementary Figure 4** Whole-exome sequencing analysis of AK and cSCC samples.

41 The oncoprint (left) displays single nucleotide variants (green) and insertions/deletions

42 (blue) found in each sample for the genes known to be most commonly mutated in the

43 human epidermis<sup>2</sup>. Filled and empty circles indicate the two distinct subgroups of AK

44 (purple) and cSCC (black), respectively. Box plots (right) indicate a statistically significant

45 ( $P=0.04$ , two-sided t-test) higher mutation counts in AK than in cSCC (top left), but no

46 statistically significant ( $P=0.52$ , two-sided t-test) differences between DNA methylation-

47 based EpSC- and keratinocyte-like AK/cSCC subgroups.

48

49 **Supplementary Table 1** Epidermis samples used in this study.

| <b>Sample ID</b> | <b>Status</b>   | <b>Gender</b> | <b>Age</b> | <b>Infinium 850k</b> | <b>Whole-exome sequencing</b> |
|------------------|-----------------|---------------|------------|----------------------|-------------------------------|
| HSy-01           | Healthy control | Male          | 27         | Yes                  | No                            |
| HSy-02           | Healthy control | Male          | 29         | Yes                  | No                            |
| HSy-03           | Healthy control | Male          | 25         | Yes                  | No                            |
| HSy-05           | Healthy control | Male          | 19         | Yes                  | No                            |
| HSy-06           | Healthy control | Male          | 28         | Yes                  | No                            |
| HSy-07           | Healthy control | Male          | 24         | Yes                  | No                            |
| HSo-01           | Healthy control | Male          | 65         | Yes                  | No                            |
| HSo-02           | Healthy control | Male          | 73         | Yes                  | No                            |
| HSo-03           | Healthy control | Male          | 71         | Yes                  | No                            |
| HSo-04           | Healthy control | Male          | 66         | Yes                  | No                            |
| HSo-05           | Healthy control | Male          | 66         | Yes                  | No                            |
| HSo-06           | Healthy control | Male          | 67         | Yes                  | No                            |
| AK-01            | AK              | Male          | 89         | Yes                  | Yes                           |
| AK-03            | AK              | Male          | 85         | Yes                  | Yes                           |
| AK-04            | AK              | Male          | 88         | Yes                  | No                            |
| AK-05            | AK              | Male          | 76         | Yes                  | Yes                           |
| AK-06            | AK              | Male          | 76         | Yes                  | Yes                           |
| AK-07            | AK              | Male          | 78         | Yes                  | Yes                           |
| AK-08            | AK              | Male          | 80         | Yes                  | Yes                           |
| AK-09            | AK              | Male          | 84         | Yes                  | No                            |
| AK-10            | AK              | Male          | 84         | Yes                  | Yes                           |
| AK-11            | AK              | Male          | 83         | Yes                  | No                            |
| AK-12            | AK              | Male          | 83         | Yes                  | No                            |
| AK-13            | AK              | Female        | 86         | Yes                  | Yes                           |
| AK-14            | AK              | Male          | 68         | Yes                  | No                            |
| AK-15            | AK              | Male          | 94         | Yes                  | Yes                           |
| AK-17            | AK              | Male          | 80         | Yes                  | No                            |
| AK-19            | AK              | Male          | 79         | Yes                  | Yes                           |
| SCC-02           | cSCC            | Male          | 92         | Yes                  | Yes                           |
| SCC-03           | cSCC            | Male          | 48         | Yes                  | No                            |
| SCC-04           | cSCC            | Male          | 85         | Yes                  | Yes                           |
| SCC-05           | cSCC            | Male          | 79         | Yes                  | No                            |
| SCC-06           | cSCC            | Male          | 70         | Yes                  | Yes                           |
| SCC-07           | cSCC            | Male          | 74         | Yes                  | Yes                           |
| SCC-08           | cSCC            | Male          | 86         | Yes                  | Yes                           |

|        |      |      |     |     |     |
|--------|------|------|-----|-----|-----|
| SCC-09 | cSCC | Male | 79  | Yes | Yes |
| SCC-10 | cSCC | Male | 56  | Yes | No  |
| SCC-11 | cSCC | Male | 92  | Yes | No  |
| SCC-12 | cSCC | Male | 99  | Yes | No  |
| SCC-13 | cSCC | Male | 88  | Yes | Yes |
| SCC-14 | cSCC | Male | 68  | Yes | Yes |
| SCC-15 | cSCC | Male | 78  | No  | Yes |
| SCC-16 | cSCC | Male | 75  | Yes | No  |
| SCC-17 | cSCC | Male | 88  | Yes | No  |
| SCC-18 | cSCC | Male | 82  | Yes | Yes |
| SCC-19 | cSCC | Male | 67  | Yes | No  |
| SCC-22 | cSCC | Male | 103 | Yes | No  |

50

51

52 **Supplementary Table 2** Technical parameters of the whole-exome sequencing analysis.

| <b>Sample ID</b> | <b>On Target Ratio %</b> | <b>Coverage</b> | <b>Mapped reads %</b> | <b>Duplicates %</b> | <b>Properly paired %</b> |
|------------------|--------------------------|-----------------|-----------------------|---------------------|--------------------------|
| AK-01            | 80.07                    | 169.51          | 99.97                 | 14.26               | 99.01                    |
| AK-03            | 81.33                    | 160.72          | 99.97                 | 19.5                | 99.23                    |
| AK-05            | 79.14                    | 165.03          | 99.97                 | 26.45               | 99.1                     |
| AK-06            | 78.99                    | 186.58          | 99.97                 | 22.19               | 99.17                    |
| AK-07            | 80.77                    | 200.62          | 99.97                 | 20.05               | 99.13                    |
| AK-08            | 79.67                    | 205.66          | 99.97                 | 19.19               | 99.14                    |
| AK-10            | 78.21                    | 148.25          | 99.96                 | 15.22               | 98.73                    |
| AK-13            | 79.31                    | 187.09          | 99.97                 | 18.93               | 99.13                    |
| AK-15            | 80.42                    | 167.66          | 99.97                 | 21.72               | 98.9                     |
| AK-19            | 80.38                    | 178.28          | 99.93                 | 19.17               | 98.81                    |
| SCC-02           | 78.99                    | 183.76          | 99.97                 | 21.72               | 98.91                    |
| SCC-04           | 79.28                    | 175.1           | 99.92                 | 19.56               | 98.99                    |
| SCC-06           | 80.74                    | 163.87          | 99.98                 | 21.49               | 99.06                    |
| SCC-07           | 78.39                    | 188.89          | 99.98                 | 19.38               | 99.09                    |
| SCC-08           | 79.2                     | 201.05          | 99.98                 | 19.56               | 99.08                    |
| SCC-09           | 79.95                    | 191.21          | 99.98                 | 21.09               | 98.99                    |
| SCC-13           | 78.75                    | 192.96          | 99.97                 | 18.34               | 99.08                    |
| SCC-14           | 80.12                    | 172.57          | 99.94                 | 19.98               | 98.9                     |
| SCC-15           | 78.3                     | 189.12          | 99.95                 | 17.49               | 98.76                    |
| SCC-18           | 80.13                    | 178.5           | 99.97                 | 19.49               | 98.95                    |

54 **Supplementary references**

55 1. Rinaldi, L. *et al.* Dnmt3a and Dnmt3b Associate with Enhancers to Regulate Human  
56 Epidermal Stem Cell Homeostasis. *Cell Stem Cell* **19**, 491–501 (2016).

57 2. Martincorena, I. *et al.* Tumor evolution. High burden and pervasive positive selection  
58 of somatic mutations in normal human skin. *Science* **348**, 880–6 (2015).

59
